# Supplementary material
Source: publisher figshare collection journal article supplement (https://gsajournals.figshare.com/ndownloader/files/23984855)
Supplement: Supplementary file 1 [file 23984855]

## Sheet: passport.v3
ID	Accession (cultivar name)	Origin	Gene bank
F001	IS 3127	Afghanistan	USDA
F002	PI 220636 Q 2/3/56	Afghanistan	NIAS
F003	PI 220636 Q2/3/56	Afghanistan	NIAS
F004	IS31681	Algeria	ICRISAT
F005	IS14257	Angola	ICRISAT
F006	Mandredi Cholila	Argentina	USDA
F007	IS14090	Argentina	ICRISAT
F008	IS12697	Australia	ICRISAT
F009	IS18757	Australia	ICRISAT
F010	ITALIAN	Australia	USDA
F011	ALLAKH	Bangladesh	NIAS
F012	IS26484	Benin	ICRISAT
F013	IS14290	Botswana	ICRISAT
F014	IS19445	Botswana	ICRISAT
F015	IS22294	Botswana	ICRISAT
F016	SAP-155	Brazil	USDA
F017	IS27557	Burkina Faso	ICRISAT
F018	IS31557	Burundi	ICRISAT
F019	BATTANBAN	Cambodia	NIAS
F020	IS15170	Cameroon	ICRISAT
F021	IS15931	Cameroon	ICRISAT
F022	IS15945	Cameroon	ICRISAT
F023	IS15151	Cameroon	ICRISAT
F024	IS16382	Cameroon	ICRISAT
F025	MILO PET. 139/51 EX TANGANYIKA	Central Africa	NIAS
F026	E 17	Chad	NIAS
F027	IS10867	Chad	ICRISAT
F028	LR 2616-1	China	USDA
F029	NUO CAO LIANG	China	NIAS
F030	BIG WHITE HULL	China	NIAS
F031	XIONG YUE 334	China	NIAS
F032	IS1212	China	ICRISAT
F033	IS1219	China	ICRISAT
F034	IS1233	China	ICRISAT
F035	IS13572	China	ICRISAT
F036	IS30417	China	ICRISAT
F037	IS30450	China	ICRISAT
F038	LR 399	China	USDA
F039	IS13570	China	ICRISAT
F040	IS29654	China	ICRISAT
F041	IS31651	Congo	ICRISAT
F042	IS12965	Cuba	ICRISAT
F043	RCV	El Salvador	USDA
F044	IS 11034	Ethiopia	USDA
F045	SC 170	Ethiopia	USDA
F046	MORABA 74	Ethiopia	NIAS
F047	THIBA RED	Ethiopia	NIAS
F048	IS11026	Ethiopia	ICRISAT
F049	IS11619	Ethiopia	ICRISAT
F050	IS12937	Ethiopia	ICRISAT
F051	IS23514	Ethiopia	ICRISAT
F052	IS25249	Ethiopia	ICRISAT
F053	IS8525	Ethiopia	ICRISAT
F054	IS18551	Ethiopia	ICRISAT
F055	IS18758	Ethiopia	ICRISAT
F056	IS25089	Ghana	ICRISAT
F057	IS17645	Ghana	ICRISAT
F058	CRIOLLO CABEZA APRETADA	Honduras	USDA
F059	CAPRICORN	Hungary	USDA
F060	IS27805	Hungary	ICRISAT
F061	IS27806	Hungary	ICRISAT
F062	Juar	India	USDA
F063	KALJANPUR	India	NIAS
F064	GOOSENECK	India	NIAS
F065	MARIANGARIJORA MUDDAHIHAL	India	NIAS
F066	DHOOTI ANEHULA	India	NIAS
F067	IS1041	India	ICRISAT
F068	IS4060	India	ICRISAT
F069	IS4372	India	ICRISAT
F070	IS4515	India	ICRISAT
F071	IS4613	India	ICRISAT
F072	IS4951	India	ICRISAT
F073	IS5295	India	ICRISAT
F074	IS5667	India	ICRISAT
F075	IS5919	India	ICRISAT
F076	IS6354	India	ICRISAT
F077	IS6421	India	ICRISAT
F078	IS17980	India	ICRISAT
F079	IS18039	India	ICRISAT
F080	IS24348	India	ICRISAT
F081	IS32349	India	ICRISAT
F082	IS33844	India	ICRISAT
F083	IS2205	India	ICRISAT
F084	IS4631	India	ICRISAT
F085	IS12883	India	ICRISAT
F086	IS19859	India	ICRISAT
F087	PI 229486 VULGARE	Iran	NIAS
F088	IS2413	Iran	ICRISAT
F089	93560	Italy	USDA
F090	SC 426	Japan	USDA
F091	OOTOYO-MURA ZAIRAI	Japan	NIAS
F092	TAKAKIMI	Japan	NIAS
F093	IKEDACHO MATSUO ZAIRAI	Japan	NIAS
F094	KOUCHI OUKAWA ZAIRAI	Japan	NIAS
F095	HIMEKI ZAIRAI	Japan	NIAS
F096	KANAGAWAZAIRAI	Japan	NIAS
F097	IS8012	Japan	ICRISAT
F098	TOKIBI	Japan	NIAS
F099	NYAN DOK	Kenya	USDA
F100	AKLMOI WHITE	Kenya	NIAS
F101	IS9177	Kenya	ICRISAT
F102	IS21083	Kenya	ICRISAT
F103	KOUSHUU ZAIRAISHU	Korea	NIAS
F104	KOUBOUSHI	Korea	NIAS
F105	MAKHOTLONG I	Lesotho	NIAS
F106	TENANT WHITE	Lesotho	NIAS
F107	IS29582	Lesotho	ICRISAT
F108	IS26617	Madagascar	ICRISAT
F109	IS21512	Malawi	ICRISAT
F110	IS21599	Malawi	ICRISAT
F111	IS25910	Mali	ICRISAT
F112	IS25989	Mali	ICRISAT
F113	65I 2786	Mexico	USDA
F114	IS13549	Mexico	ICRISAT
F115	KOURNIANIA	Morocco	NIAS
F116	PHATSAI	Morocco	NIAS
F117	SCHROCK	Morocco	NIAS
F118	IS23684	Mozambique	ICRISAT
F119	AS 5781 HUAN SA PHAUNG AH LPYSU	Myanmar	NIAS
F120	IS22616	Myanmar	ICRISAT
F121	EC 18868	Nepal	NIAS
F122	IS12945	Nicaragua	ICRISAT
F123	IS20195	Niger	ICRISAT
F124	IS20298	Niger	ICRISAT
F125	KO 8	Nigeria	USDA
F126	AS 4547 JARDIRA	Nigeria	NIAS
F127	MN 1277 MUHEYAR	Nigeria	NIAS
F128	IS7305	Nigeria	ICRISAT
F129	IS7310	Nigeria	ICRISAT
F130	IS7679	Nigeria	ICRISAT
F131	IS7987	Nigeria	ICRISAT
F132	Dhurra	Oman	USDA
F133	COL/PAK/1989/IBPGR/2420(1)	Pakistan	NIAS
F134	COL/PAK/1989/IBPGR/2427(5)	Pakistan	NIAS
F135	COL/PAK/1989/IBPGR/2411(1)	Pakistan	NIAS
F136	IS8348	Pakistan	ICRISAT
F137	IS13122	Pakistan	ICRISAT
F138	MOCTAC LOCAL	Republic of Korea	NIAS
F139	IS30533	Republic of Korea	ICRISAT
F140	IS30536	Republic of Korea	ICRISAT
F141	IS30507	Republic of Korea	ICRISAT
F142	IS30562	Republic of Korea	ICRISAT
F143	SOR 1	Romania	USDA
F144	IS14154	Russian Federation	ICRISAT
F145	IS35807	Russian Federation	ICRISAT
F146	IS35957	Russian Federation	ICRISAT
F147	NYIRARUMOGO	Rwanda	USDA
F148	IS25548	Rwanda	ICRISAT
F149	15065	Saudi Arabia	USDA
F150	IS19975	Senegal	ICRISAT
F151	IS27697	Sierra Leone	ICRISAT
F152	IS22720	Somalia	ICRISAT
F153	IS22799	Somalia	ICRISAT
F154	IS32787	Somalia	ICRISAT
F155	433	South Africa	USDA
F156	EAR FROM PIETESBURG DL/60/107	South Africa	NIAS
F157	IS2397	South Africa	ICRISAT
F158	IS24453	South Africa	ICRISAT
F159	IS24503	South Africa	ICRISAT
F160	IS26701	South Africa	ICRISAT
F161	IS26737	South Africa	ICRISAT
F162	IS29606	South Africa	ICRISAT
F163	IS29627	South Africa	ICRISAT
F164	IS3436	South Africa	ICRISAT
F165	IS13868	South Africa	ICRISAT
F166	IS13872	South Africa	ICRISAT
F167	IS13782	South Africa	ICRISAT
F168	IS13869	South Africa	ICRISAT
F169	AGIRA	Sudan	USDA
F170	MENDO	Sudan	USDA
F171	ZIRA-EL-SABI	Sudan	USDA
F172	SC 56	Sudan	USDA
F173	HEGARI MALOWAR	Sudan	NIAS
F174	143 DINDERAWI 1	Sudan	NIAS
F175	E 1091	Sudan	NIAS
F176	IS19153	Sudan	ICRISAT
F177	IS19262	Sudan	ICRISAT
F178	IS22986	Sudan	ICRISAT
F179	IS3547	Sudan	ICRISAT
F180	IS6900	Sudan	ICRISAT
F181	GULUM ABIAD	Sudan	USDA
F182	IS 27034	Sudan	ICRISAT
F183	IS29233	Swaziland	ICRISAT
F184	IS29241	Swaziland	ICRISAT
F185	IS29269	Swaziland	ICRISAT
F186	IS29314	Swaziland	ICRISAT
F187	IS29326	Swaziland	ICRISAT
F188	IS29239	Swaziland	ICRISAT
F189	26524	Taiwan	NIAS
F190	ITALIAN	Taiwan	USDA
F191	IS24175	Tanzania	ICRISAT
F192	IS33023	Tanzania	ICRISAT
F193	8493	Turkey	USDA
F194	IS12804	Turkey	ICRISAT
F195	S. VULGARE 72-726-7	Uganda	NIAS
F196	S. VULGARE 72-728-1	Uganda	NIAS
F197	E 276 FRAMIDA	Uganda	NIAS
F198	IS7131	Uganda	ICRISAT
F199	IS8916	Uganda	ICRISAT
F200	IS31043	Uganda	ICRISAT
F201	IS31186	Uganda	ICRISAT
F202	IS31446	Uganda	ICRISAT
F203	IS9249	Uganda	ICRISAT
F204	A-6129	Union of Soviet Socialist Republic	USDA
F205	PERSIAN DWARF	United Kingdom	USDA
F206	RTx432	United States of America	USDA
F207	TX2783	United States of America	USDA
F208	B2AR3043	United States of America	USDA
F209	RTx430	United States of America	USDA
F210	RIO	United States of America	USDA
F211	BTx623	United States of America	USDA
F212	BTx642	United States of America	USDA
F213	IS473	United States of America	ICRISAT
F214	IS3121	United States of America	ICRISAT
F215	IS20632	United States of America	ICRISAT
F216	IS20679	United States of America	ICRISAT
F217	IS20713	United States of America	ICRISAT
F218	IS20727	United States of America	ICRISAT
F219	IS20740	United States of America	ICRISAT
F220	IS20743	United States of America	ICRISAT
F221	IS20816	United States of America	ICRISAT
F222	IS10288	United States of America	ICRISAT
F223	IS10475	United States of America	ICRISAT
F224	IS10646	United States of America	ICRISAT
F225	IS18729	United States of America	ICRISAT
F226	B.Tx2922	United States of America	USDA
F227	R2line AR 3032	United States of America	USDA
F228	B3Tx2817	United States of America	USDA
F229	IS10969	United States of America	ICRISAT
F230	IS13295	Venezuela	ICRISAT
F231	IS23992	Yemen	ICRISAT
F232	IS28141	Yemen	ICRISAT
F233	IS28451	Yemen	ICRISAT
F234	IS28747	Yemen	ICRISAT
F235	IS29100	Yemen	ICRISAT
F236	IS24939	Zambia	ICRISAT
F237	WAD YABOO 132/53	Zimbabwe	NIAS
F238	TSETA LOCAL NATURE TYPE 27/51	Zimbabwe	NIAS
F239	IS2838	Zimbabwe	ICRISAT
F240	IS19676	Zimbabwe	ICRISAT
F241	IS29689	Zimbabwe	ICRISAT
F242	IS29733	Zimbabwe	ICRISAT
F243	IS29772	Zimbabwe	ICRISAT
F244	IS30231	Zimbabwe	ICRISAT
F245	IS19670	Zimbabwe	ICRISAT
F246	IS12302	Zimbabwe	ICRISAT
F247	IS 8267		USDA
